# Supplementary material
Source: publisher figshare collection journal article supplement (https://sage.figshare.com/ndownloader/files/17985725)

Figure S1. Network structures at all time points

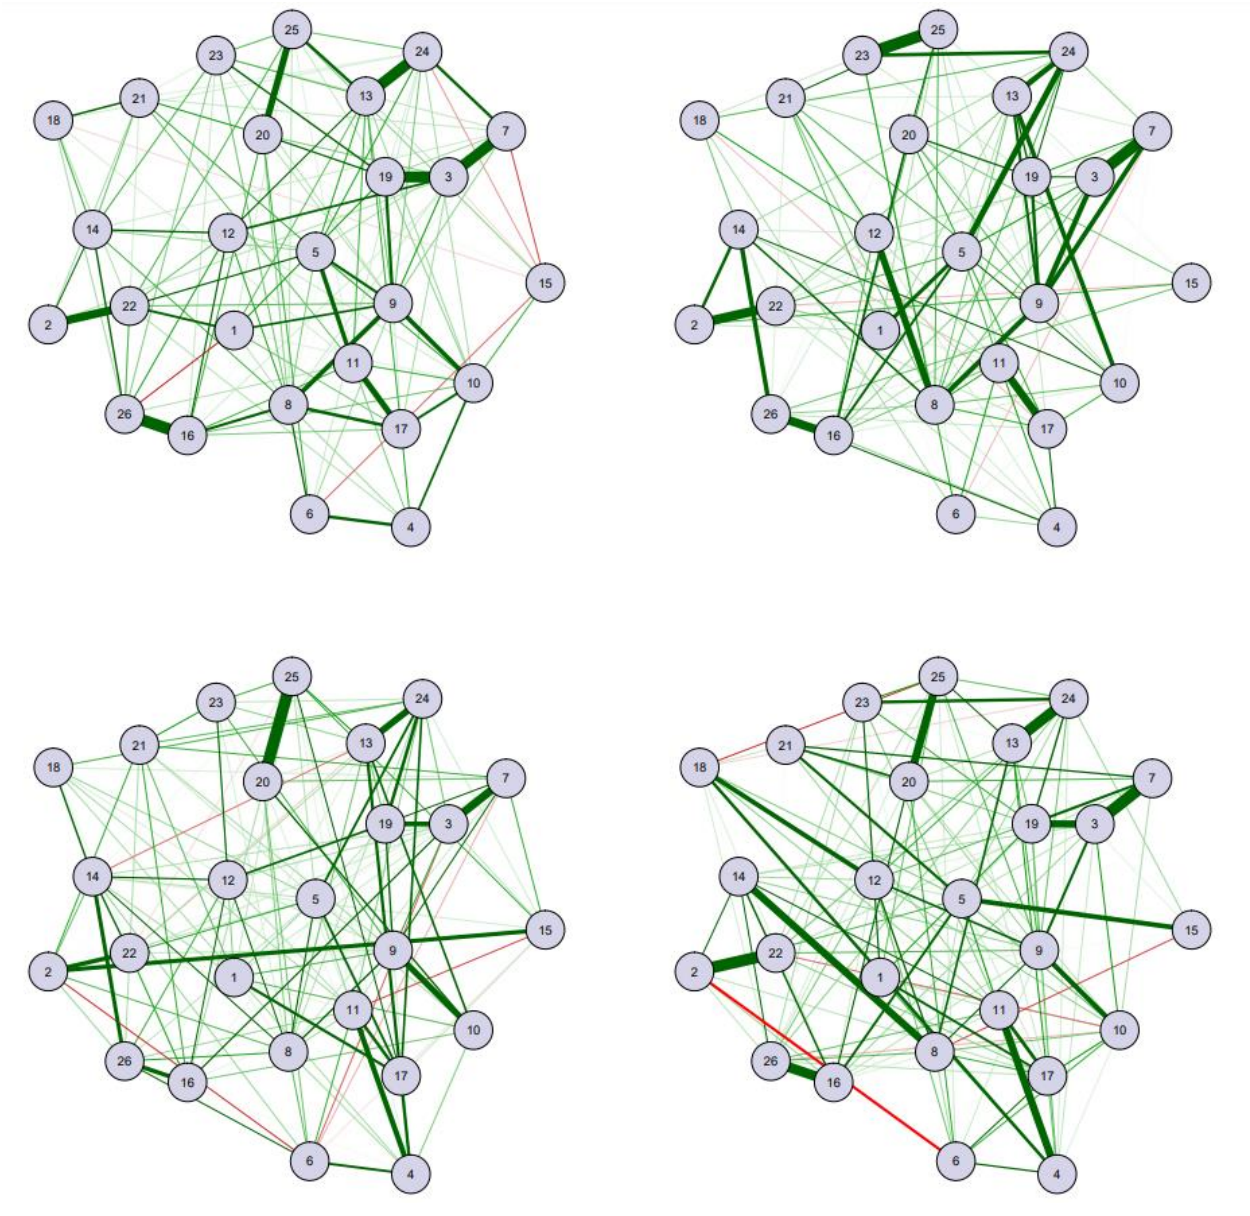

Figure S2. Bridge Centrality Between AN and Depression

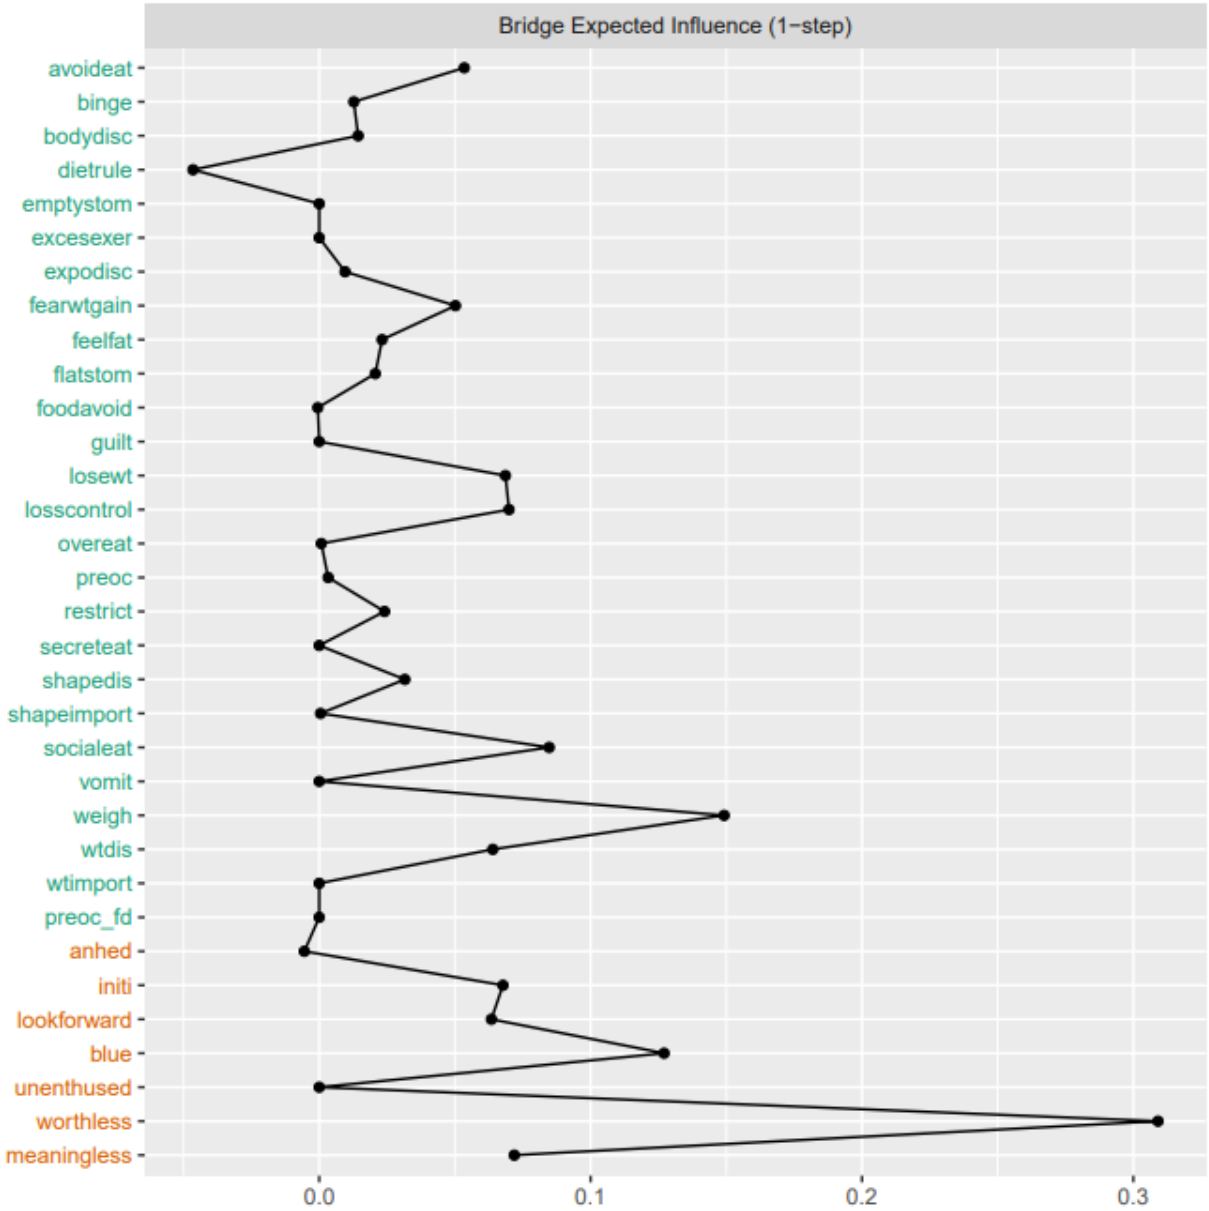

Figure S2. Bridge Centrality Between AN and Anxiety/Stress

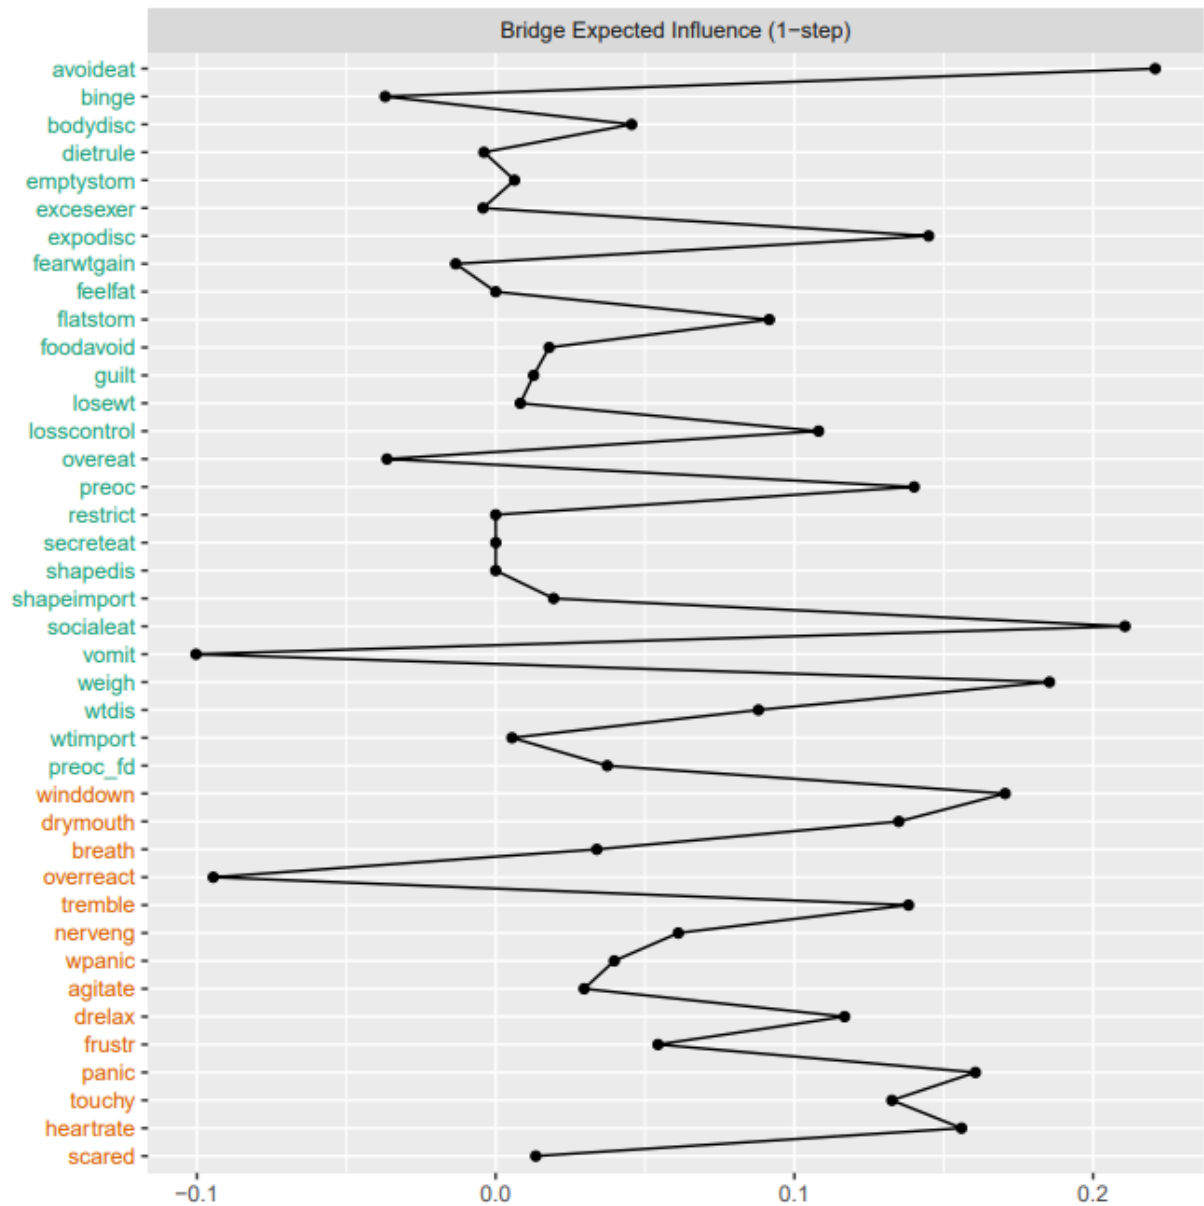

Supplement: Supplementary file 1 [file 17985725]
